# Supplementary material for: Association of Cardiac Biomarkers With the Kansas City Cardiomyopathy Questionnaire in Patients With Chronic Kidney Disease Without Heart Failure
Source: PubMed Central journal article supplement — J Am Heart Assoc. 2020 Jun 24;9(13):e014385. doi: 10.1161/JAHA.119.014385 (PMC7670503; doi:10.1161/jaha.119.014385), 2020-06-24
Supplement: JAH3-9-e014385-s001.pdf [file JAH3-9-e014385-s001.pdf]

# **SUPPLEMENTAL MATERIAL**

**Table S1. Demographic characteristics by quintile of galectin-3 (N = 2873).**

|                                                          | <b>Quintile 1</b><br><b>≤ 9.11 pg/mL</b><br><b>(N = 576)</b> | <b>Quintile 2</b><br><b>9.12 – 12.2</b><br><b>pg/mL</b><br><b>(N = 573)</b> | <b>Quintile 3</b><br><b>12.3 – 15.4</b><br><b>pg/mL</b><br><b>(N = 575)</b> | <b>Quintile 4</b><br><b>15.5 – 20.1</b><br><b>pg/mL</b><br><b>(N = 574)</b> | <b>Quintile 5</b><br><b>&gt; 20.1 pg/mL</b><br><b>(N = 575)</b> |
|----------------------------------------------------------|--------------------------------------------------------------|-----------------------------------------------------------------------------|-----------------------------------------------------------------------------|-----------------------------------------------------------------------------|-----------------------------------------------------------------|
| <b>Demographics</b>                                      |                                                              |                                                                             |                                                                             |                                                                             |                                                                 |
| Age                                                      | 57 (10.9)                                                    | 59 (11.3)                                                                   | 59 (10.7)                                                                   | 60 (10.7)                                                                   | 61 (10.1)                                                       |
| Male                                                     | 376 (65)                                                     | 345 (60)                                                                    | 300 (52)                                                                    | 298 (52)                                                                    | 239 (42)                                                        |
| Race/ethnicity                                           |                                                              |                                                                             |                                                                             |                                                                             |                                                                 |
| Non-Hispanic white                                       | 341 (59)                                                     | 296 (52)                                                                    | 266 (46)                                                                    | 224 (39)                                                                    | 187 (33)                                                        |
| Non-Hispanic black                                       | 179 (31)                                                     | 197 (34)                                                                    | 232 (40)                                                                    | 236 (41)                                                                    | 267 (46)                                                        |
| Hispanic                                                 | 32 (6)                                                       | 51 (9)                                                                      | 55 (10)                                                                     | 86 (15)                                                                     | 100 (17)                                                        |
| Other                                                    | 24 (4)                                                       | 29 (5)                                                                      | 22 (4)                                                                      | 28 (5)                                                                      | 21 (4)                                                          |
| <b>Comorbidities</b>                                     |                                                              |                                                                             |                                                                             |                                                                             |                                                                 |
| Cardiovascular disease                                   | 125 (22)                                                     | 140 (24)                                                                    | 157 (27)                                                                    | 171 (30)                                                                    | 213 (37)                                                        |
| MI/prior revascularization                               | 83 (14)                                                      | 100 (17)                                                                    | 106 (18)                                                                    | 110 (19)                                                                    | 131 (23)                                                        |
| COPD                                                     | 21 (4)                                                       | 28 (5)                                                                      | 22 (4)                                                                      | 22 (4)                                                                      | 28 (5)                                                          |
| Atrial fibrillation                                      | 72 (12)                                                      | 89 (16)                                                                     | 75 (13)                                                                     | 87 (15)                                                                     | 96 (17)                                                         |
| Stroke                                                   | 42 (7)                                                       | 37 (6)                                                                      | 57 (10)                                                                     | 59 (10)                                                                     | 74 (13)                                                         |
| Diabetes                                                 | 206 (36)                                                     | 211 (37)                                                                    | 263 (46)                                                                    | 296 (52)                                                                    | 365 (63)                                                        |
| <b>Clinical variables</b>                                |                                                              |                                                                             |                                                                             |                                                                             |                                                                 |
| Systolic blood pressure (mmHg)                           | 120.2 (19.7)                                                 | 124.1 (19.4)                                                                | 126.0 (21.0)                                                                | 129.7 (22.2)                                                                | 132.2 (22.2)                                                    |
| BMI (kg/m <sup>2</sup> )                                 | 31 (6.4)                                                     | 31 (7.6)                                                                    | 32 (7.2)                                                                    | 33 (8.1)                                                                    | 34 (8.3)                                                        |
| Current smoking                                          | 41 (7)                                                       | 59 (10)                                                                     | 88 (15)                                                                     | 67 (12)                                                                     | 85 (15)                                                         |
| <b>Laboratory and imaging variables</b>                  |                                                              |                                                                             |                                                                             |                                                                             |                                                                 |
| eGFR (CKD-EPI) (mL/min/1.73m <sup>2</sup> )              | 51.8 (15.2)                                                  | 45.8 (15.0)                                                                 | 43.8 (15.1)                                                                 | 39.4 (13.8)                                                                 | 35.0 (14.0)                                                     |
| Urinary protein to creatinine ratio from 24hr urine test | 74 (41-259)                                                  | 93 (46-513)                                                                 | 113 (53-577)                                                                | 144 (58-622)                                                                | 339 (83-1330)                                                   |
| Ejection fraction (%)                                    | 54.9 (7.4)                                                   | 55.5 (7.1)                                                                  | 55.5 (7.3)                                                                  | 55.2 (7.5)                                                                  | 55.2 (7.0)                                                      |
| Left ventricular mass index (g)                          | 57.5 (20.3)                                                  | 61.9 (21.5)                                                                 | 61.9 (21.8)                                                                 | 65.0 (23.1)                                                                 | 68.6 (23.4)                                                     |
| <b>Medications</b>                                       |                                                              |                                                                             |                                                                             |                                                                             |                                                                 |
| ACEi/ARB                                                 | 361 (63)                                                     | 391 (68)                                                                    | 397 (69)                                                                    | 408 (71)                                                                    | 415 (72)                                                        |
| Diuretics                                                | 253 (44)                                                     | 301 (53)                                                                    | 300 (52)                                                                    | 372 (65)                                                                    | 390 (68)                                                        |
| Beta blockers                                            | 221 (38)                                                     | 258 (45)                                                                    | 264 (46)                                                                    | 301 (52)                                                                    | 305 (53)                                                        |

Entries are mean (SD) for continuous covariates or N (%) for categorical covariates, except as noted.

MI – myocardial infarction; COPD – chronic obstructive pulmonary disease; BMI – body mass index; eGFR – estimated glomerular filtration rate; CKD-EPI – Chronic Kidney Disease Epidemiology Collaboration; ACEi – angiotensin converting enzyme inhibitor; ARB – angiotensin receptor blocker

**Table S2. Demographic characteristics by quintile of sST-2 (N = 2873).**

|                                                          | <b>Quintile 1</b><br><b>≤ 10.4 pg/mL</b><br><b>(N = 577)</b> | <b>Quintile 2</b><br><b>10.5 – 13.4</b><br><b>pg/mL</b><br><b>(N = 573)</b> | <b>Quintile 3</b><br><b>13.5 – 16.8</b><br><b>pg/mL</b><br><b>(N = 574)</b> | <b>Quintile 4</b><br><b>16.9 – 22 pg/mL</b><br><b>(N = 574)</b> | <b>Quintile 5</b><br><b>&gt; 22 pg/mL</b><br><b>(N = 575)</b> |
|----------------------------------------------------------|--------------------------------------------------------------|-----------------------------------------------------------------------------|-----------------------------------------------------------------------------|-----------------------------------------------------------------|---------------------------------------------------------------|
| <b>Demographics</b>                                      |                                                              |                                                                             |                                                                             |                                                                 |                                                               |
| Age                                                      | 57 (11.6)                                                    | 59 (10.1)                                                                   | 60 (10.6)                                                                   | 60 (10.6)                                                       | 60 (10.9)                                                     |
| Male                                                     | 227 (39)                                                     | 264 (46)                                                                    | 299 (52)                                                                    | 369 (64)                                                        | 399 (69)                                                      |
| <b>Race/ethnicity</b>                                    |                                                              |                                                                             |                                                                             |                                                                 |                                                               |
| Non-Hispanic white                                       | 237 (41)                                                     | 270 (47)                                                                    | 262 (46)                                                                    | 265 (46)                                                        | 280 (49)                                                      |
| Non-Hispanic black                                       | 254 (44)                                                     | 238 (42)                                                                    | 227 (40)                                                                    | 203 (35)                                                        | 189 (33)                                                      |
| Hispanic                                                 | 53 (9)                                                       | 46 (8)                                                                      | 63 (11)                                                                     | 79 (14)                                                         | 83 (14)                                                       |
| Other                                                    | 33 (6)                                                       | 19 (3)                                                                      | 22 (4)                                                                      | 27 (5)                                                          | 23 (4)                                                        |
| <b>Comorbidities</b>                                     |                                                              |                                                                             |                                                                             |                                                                 |                                                               |
| Cardiovascular disease                                   | 108 (19)                                                     | 161 (28)                                                                    | 152 (26)                                                                    | 188 (33)                                                        | 197 (34)                                                      |
| MI/prior revascularization                               | 65 (11)                                                      | 104 (18)                                                                    | 96 (17)                                                                     | 129 (22)                                                        | 136 (24)                                                      |
| COPD                                                     | 25 (4)                                                       | 27 (5)                                                                      | 23 (4)                                                                      | 19 (3)                                                          | 27 (5)                                                        |
| Atrial fibrillation                                      | 64 (11)                                                      | 93 (16)                                                                     | 86 (15)                                                                     | 89 (16)                                                         | 87 (15)                                                       |
| Stroke                                                   | 39 (7)                                                       | 55 (10)                                                                     | 57 (10)                                                                     | 57 (10)                                                         | 61 (11)                                                       |
| Diabetes                                                 | 193 (33)                                                     | 242 (42)                                                                    | 250 (44)                                                                    | 321 (56)                                                        | 335 (58)                                                      |
| <b>Clinical variables</b>                                |                                                              |                                                                             |                                                                             |                                                                 |                                                               |
| Systolic blood pressure (mmHg)                           | 123.1 (19.9)                                                 | 124.2 (20.1)                                                                | 126.1 (20.9)                                                                | 130.4 (22.9)                                                    | 128.4 (21.9)                                                  |
| BMI (kg/m <sup>2</sup> )                                 | 32 (7.7)                                                     | 32 (7.8)                                                                    | 32 (7.3)                                                                    | 32 (7.9)                                                        | 31 (7.3)                                                      |
| Current smoking                                          | 80 (14)                                                      | 67 (12)                                                                     | 69 (12)                                                                     | 61 (11)                                                         | 63 (11)                                                       |
| <b>Laboratory and imaging variables</b>                  |                                                              |                                                                             |                                                                             |                                                                 |                                                               |
| eGFR (CKD-EPI) (mL/min/1.73m <sup>2</sup> )              | 46.4 (16.6)                                                  | 44.2 (15.3)                                                                 | 44.1 (15.2)                                                                 | 41.4 (15.7)                                                     | 39.6 (14.8)                                                   |
| Urinary protein to creatinine ratio from 24hr urine test | 78 (44-295)                                                  | 99 (47-380)                                                                 | 98 (48-484)                                                                 | 183 (60-885)                                                    | 293 (78-1303)                                                 |
| Ejection fraction (%)                                    | 55.9 (7.3)                                                   | 55.2 (7.2)                                                                  | 55.4 (7.3)                                                                  | 55.1 (7.4)                                                      | 54.7 (7.1)                                                    |
| Left ventricular mass index (g)                          | 59.6 (22.5)                                                  | 62.0 (22.3)                                                                 | 62.5 (22.5)                                                                 | 65.5 (21.7)                                                     | 64.7 (22.0)                                                   |
| <b>Medications</b>                                       |                                                              |                                                                             |                                                                             |                                                                 |                                                               |
| ACEi/ARB                                                 | 352 (61)                                                     | 401 (70)                                                                    | 393 (68)                                                                    | 421 (73)                                                        | 405 (70)                                                      |
| Diuretics                                                | 274 (47)                                                     | 319 (56)                                                                    | 306 (53)                                                                    | 351 (61)                                                        | 366 (64)                                                      |
| Beta blockers                                            | 228 (40)                                                     | 246 (43)                                                                    | 275 (48)                                                                    | 289 (50)                                                        | 311 (54)                                                      |

Entries are mean (SD) for continuous covariates or N (%) for categorical covariates, except as noted.

MI – myocardial infarction; COPD – chronic obstructive pulmonary disease; BMI – body mass index; eGFR – estimated glomerular filtration rate; CKD-EPI – Chronic Kidney Disease Epidemiology Collaboration; ACEi – angiotensin converting enzyme inhibitor; ARB – angiotensin receptor blocker

**Table S3. Demographic characteristics by category of hsTNT (N = 2873).**

|                                                          | <LLD<br>≤ 10 ng/L<br>(N = 1023) | Tertile 1<br>10.1 – 14.7 ng/L<br>(N = 572) | Tertile 2<br>14.8 – 23.9 ng/L<br>(N = 631) | Tertile 3<br>>23.9 ng/L<br>(N = 647) |
|----------------------------------------------------------|---------------------------------|--------------------------------------------|--------------------------------------------|--------------------------------------|
| <b>Demographics</b>                                      |                                 |                                            |                                            |                                      |
| Age                                                      | 55 (11.4)                       | 60 (10.1)                                  | 62 (9.8)                                   | 61 (9.6)                             |
| Male                                                     | 357 (35)                        | 309 (54)                                   | 407 (65)                                   | 485 (75)                             |
| <b>Race/ethnicity</b>                                    |                                 |                                            |                                            |                                      |
| Non-Hispanic white                                       | 526 (51)                        | 296 (52)                                   | 280 (44)                                   | 212 (33)                             |
| Non-Hispanic black                                       | 349 (34)                        | 198 (35)                                   | 257 (41)                                   | 307 (47)                             |
| Hispanic                                                 | 89 (9)                          | 58 (10)                                    | 69 (11)                                    | 108 (17)                             |
| Other                                                    | 59 (6)                          | 20 (3)                                     | 25 (4)                                     | 20 (3)                               |
| <b>Comorbidities</b>                                     |                                 |                                            |                                            |                                      |
| Cardiovascular disease                                   | 169 (17)                        | 142 (25)                                   | 223 (35)                                   | 272 (42)                             |
| MI/prior revascularization                               | 107 (10)                        | 98 (17)                                    | 150 (24)                                   | 175 (27)                             |
| COPD                                                     | 42 (4)                          | 15 (3)                                     | 33 (5)                                     | 31 (5)                               |
| Atrial fibrillation                                      | 116 (11)                        | 75 (13)                                    | 114 (18)                                   | 114 (18)                             |
| Stroke                                                   | 63 (6)                          | 46 (8)                                     | 76 (12)                                    | 84 (13)                              |
| Diabetes                                                 | 267 (26)                        | 240 (42)                                   | 344 (55)                                   | 490 (76)                             |
| <b>Clinical variables</b>                                |                                 |                                            |                                            |                                      |
| Systolic blood pressure (mmHg)                           | 120.1 (18.5)                    | 124.9 (20.2)                               | 130.5 (22.2)                               | 133.9 (22.3)                         |
| BMI (kg/m <sup>2</sup> )                                 | 31 (7.6)                        | 32 (7.5)                                   | 33 (7.9)                                   | 33 (7.1)                             |
| Current smoking                                          | 119 (12)                        | 73 (13)                                    | 70 (11)                                    | 78 (12)                              |
| <b>Laboratory and imaging variables</b>                  |                                 |                                            |                                            |                                      |
| eGFR (CKD-EPI) (mL/min/1.73m <sup>2</sup> )              | 50.2 (15.8)                     | 43.6 (13.6)                                | 40.0 (13.5)                                | 34.6 (14.1)                          |
| Urinary protein to creatinine ratio from 24hr urine test | 72 (42-218)                     | 92 (49-350)                                | 155 (63-745)                               | 472 (128-1931)                       |
| Ejection fraction (%)                                    | 56.0 (6.3)                      | 56.0 (7.2)                                 | 54.7 (7.7)                                 | 53.7 (8.1)                           |
| Left ventricular mass index (g)                          | 53.6 (16.6)                     | 61.4 (19.2)                                | 67.5 (22.9)                                | 75.9 (25.3)                          |
| <b>Medications</b>                                       |                                 |                                            |                                            |                                      |
| ACEi/ARB                                                 | 616 (60)                        | 408 (71)                                   | 475 (75)                                   | 473 (73)                             |
| Diuretics                                                | 419 (41)                        | 314 (55)                                   | 405 (64)                                   | 478 (74)                             |
| Beta blockers                                            | 374 (37)                        | 268 (47)                                   | 333 (53)                                   | 374 (58)                             |

Entries are mean (SD) for continuous covariates or N (%) for categorical covariates, except as noted.

LLD - Lower Limit of Detection; MI – myocardial infarction; COPD – chronic obstructive pulmonary disease; BMI – body mass index; eGFR – estimated glomerular filtration rate; CKD-EPI – Chronic Kidney Disease Epidemiology Collaboration; ACEi – angiotensin converting enzyme inhibitor; ARB – angiotensin receptor blocker

**Table S4. Demographic characteristics by quintile of NT-proBNP (N = 2873).**

|                                                          | <b>Quintile 1</b><br><b>≤ 30.9 pg/mL</b><br><b>(N = 575)</b> | <b>Quintile 2</b><br><b>31 – 76 pg/mL</b><br><b>(N = 574)</b> | <b>Quintile 3</b><br><b>76.1 – 158</b><br><b>pg/mL</b><br><b>(N = 575)</b> | <b>Quintile 4</b><br><b>158.1 – 370</b><br><b>pg/mL</b><br><b>(N = 574)</b> | <b>Quintile 5</b><br><b>&gt; 370 pg/mL</b><br><b>(N = 575)</b> |
|----------------------------------------------------------|--------------------------------------------------------------|---------------------------------------------------------------|----------------------------------------------------------------------------|-----------------------------------------------------------------------------|----------------------------------------------------------------|
| <b>Demographics</b>                                      |                                                              |                                                               |                                                                            |                                                                             |                                                                |
| Age                                                      | 54 (11.4)                                                    | 58 (10.7)                                                     | 60 (10.7)                                                                  | 61 (10.0)                                                                   | 62 (9.4)                                                       |
| Male                                                     | 376 (65)                                                     | 296 (52)                                                      | 311 (54)                                                                   | 264 (46)                                                                    | 311 (54)                                                       |
| <b>Race/ethnicity</b>                                    |                                                              |                                                               |                                                                            |                                                                             |                                                                |
| Non-Hispanic white                                       | 253 (44)                                                     | 264 (46)                                                      | 277 (48)                                                                   | 290 (51)                                                                    | 230 (40)                                                       |
| Non-Hispanic black                                       | 257 (45)                                                     | 234 (41)                                                      | 216 (38)                                                                   | 191 (33)                                                                    | 213 (37)                                                       |
| Hispanic                                                 | 34 (6)                                                       | 48 (8)                                                        | 63 (11)                                                                    | 69 (12)                                                                     | 110 (19)                                                       |
| Other                                                    | 31 (5)                                                       | 28 (5)                                                        | 19 (3)                                                                     | 24 (4)                                                                      | 22 (4)                                                         |
| <b>Comorbidities</b>                                     |                                                              |                                                               |                                                                            |                                                                             |                                                                |
| Cardiovascular disease                                   | 76 (13)                                                      | 112 (20)                                                      | 156 (27)                                                                   | 182 (32)                                                                    | 280 (49)                                                       |
| MI/prior revascularization                               | 46 (8)                                                       | 65 (11)                                                       | 96 (17)                                                                    | 129 (22)                                                                    | 194 (34)                                                       |
| COPD                                                     | 15 (3)                                                       | 25 (4)                                                        | 19 (3)                                                                     | 34 (6)                                                                      | 28 (5)                                                         |
| Atrial fibrillation                                      | 52 (9)                                                       | 62 (11)                                                       | 74 (13)                                                                    | 90 (16)                                                                     | 141 (25)                                                       |
| Stroke                                                   | 25 (4)                                                       | 42 (7)                                                        | 52 (9)                                                                     | 67 (12)                                                                     | 83 (14)                                                        |
| Diabetes                                                 | 197 (34)                                                     | 248 (43)                                                      | 268 (47)                                                                   | 290 (51)                                                                    | 338 (59)                                                       |
| <b>Clinical variables</b>                                |                                                              |                                                               |                                                                            |                                                                             |                                                                |
| Systolic blood pressure (mmHg)                           | 120.1 (17.7)                                                 | 123.1 (19.2)                                                  | 125.0 (20.4)                                                               | 130.1 (22.1)                                                                | 134.0 (23.8)                                                   |
| BMI (kg/m <sup>2</sup> )                                 | 32 (7.0)                                                     | 32 (7.1)                                                      | 32 (7.7)                                                                   | 32 (8.4)                                                                    | 32 (7.7)                                                       |
| Current smoking                                          | 53 (9)                                                       | 57 (10)                                                       | 62 (11)                                                                    | 72 (13)                                                                     | 96 (17)                                                        |
| <b>Laboratory and imaging variables</b>                  |                                                              |                                                               |                                                                            |                                                                             |                                                                |
| eGFR (CKD-EPI) (mL/min/1.73m <sup>2</sup> )              | 53.3 (14.6)                                                  | 46.5 (14.5)                                                   | 42.8 (15.1)                                                                | 39.6 (13.7)                                                                 | 33.5 (13.2)                                                    |
| Urinary protein to creatinine ratio from 24hr urine test | 69 (42-214)                                                  | 96 (48-456)                                                   | 128 (54-543)                                                               | 140 (56-739)                                                                | 329 (85-1390)                                                  |
| Ejection fraction (%)                                    | 55.6 (6.3)                                                   | 56.2 (6.2)                                                    | 55.6 (6.9)                                                                 | 55.4 (7.4)                                                                  | 53.2 (9.0)                                                     |
| Left ventricular mass index (g)                          | 55.2 (17.6)                                                  | 59.3 (20.1)                                                   | 62.0 (21.4)                                                                | 62.9 (20.9)                                                                 | 76.3 (25.8)                                                    |
| <b>Medications</b>                                       |                                                              |                                                               |                                                                            |                                                                             |                                                                |
| ACEi/ARB                                                 | 394 (69)                                                     | 387 (67)                                                      | 416 (72)                                                                   | 390 (68)                                                                    | 385 (67)                                                       |
| Diuretics                                                | 246 (43)                                                     | 294 (51)                                                      | 330 (57)                                                                   | 343 (60)                                                                    | 403 (70)                                                       |
| Beta blockers                                            | 150 (26)                                                     | 215 (37)                                                      | 258 (45)                                                                   | 336 (59)                                                                    | 390 (68)                                                       |

Entries are mean (SD) for continuous covariates or N (%) for categorical covariates, except as noted.

MI – myocardial infarction; COPD – chronic obstructive pulmonary disease; BMI – body mass index; eGFR – estimated glomerular filtration rate; CKD-EPI – Chronic Kidney Disease Epidemiology Collaboration; ACEi – angiotensin converting enzyme inhibitor; ARB – angiotensin receptor blocker

**Table S5. Correlations of log-transformed biomarkers adjusted for age and sex.**

|                   | <b>GDF-15</b> | <b>Galectin-3</b> | <b>sST-2</b> | <b>hsTnT</b> | <b>NT-proBNP</b> |
|-------------------|---------------|-------------------|--------------|--------------|------------------|
| <b>GDF-15</b>     | 1.00          | 0.35              | 0.28         | 0.32         | 0.31             |
| <b>Galectin-3</b> |               | 1.00              | 0.12         | 0.17         | 0.15             |
| <b>sST-2</b>      |               |                   | 1.00         | 0.13         | 0.11             |
| <b>hsTnT</b>      |               |                   |              | 1.00         | 0.24             |
| <b>NT-proBNP</b>  |               |                   |              |              | 1.00             |

Entries are the partial correlation between the log-transformed biomarkers adjusting for age and sex.

**Table S6. Effect of adjustment for LV mass index, ejection fraction, and baseline KCCQ scores on the associations of biomarkers with year 1 KCCQ <75 and incident decline in KCCQ scores.**

|                                    |                                                   | Model 2                                                 | Model 3               | Model 4               | Model 5               |
|------------------------------------|---------------------------------------------------|---------------------------------------------------------|-----------------------|-----------------------|-----------------------|
| <b>GDF-15 Continuous Model</b>     | KCCQ <75<br>OR (99% CI)                           | 1.42<br>(1.19, 1.68)*                                   | 1.33<br>(1.12, 1.59)* | 1.41<br>(1.19, 1.68)* | --                    |
|                                    | Log(GDF-15) per 1 SD<br>(0.58 pg/mL) increase     | Incident Decline in<br>KCCQ<br>HR (99% CI)              | 1.36<br>(1.12, 1.65)* | 1.32<br>(1.07, 1.61)* | 1.34<br>(1.11, 1.63)* |
| <b>Galectin-3 Continuous Model</b> | KCCQ <75<br>OR (99% CI)                           | 1.28<br>(1.12, 1.48)*                                   | 1.23<br>(1.07, 1.41)* | 1.29<br>(1.12, 1.48)* | --                    |
|                                    | Log(Galectin-3) per 1 SD<br>(0.50 pg/mL) increase | Incident Decline in<br>KCCQ <sup>^</sup><br>HR (99% CI) | 1.08<br>(0.92, 1.26)  | 1.05<br>(0.90, 1.23)  | 1.08<br>(0.92, 1.26)  |
| <b>sST-2 Continuous Model</b>      | KCCQ <75<br>OR (99% CI)                           | 1.12<br>(0.98, 1.28)                                    | 1.07<br>(0.94, 1.21)  | 1.12<br>(0.98, 1.28)  | --                    |
|                                    | Log(sST-2) per 1 SD<br>(0.55 pg/mL) increase      | Incident Decline in<br>KCCQ<br>HR (99% CI)              | 1.08<br>(0.92, 1.26)  | 1.04<br>(0.90, 1.22)  | 1.08<br>(0.93, 1.27)  |
| <b>hsTnT Continuous Model</b>      | KCCQ <75<br>OR (99% CI)                           | 1.10<br>(0.93, 1.31)                                    | 1.01<br>(0.85, 1.20)  | 1.10<br>(0.92, 1.30)  | --                    |
|                                    | Log(hsTnT) per 1 SD<br>(0.78 ng/L) increase       | Incident Decline in<br>KCCQ<br>HR (99% CI)              | 1.20<br>(1.01, 1.44)* | 1.15<br>(0.95, 1.39)  | 1.17<br>(0.97, 1.40)  |
| <b>NT-proBNP Continuous Model</b>  | KCCQ <75<br>OR (99% CI)                           | 1.03<br>(0.88, 1.21)                                    | 0.97<br>(0.83, 1.14)  | 1.02<br>(0.87, 1.20)  | --                    |
|                                    | Log(NT-proBNP) per 1<br>SD (1.60pg/mL) increase   | Incident Decline in<br>KCCQ<br>HR (99% CI)              | 1.30<br>(1.08, 1.56)* | 1.26<br>(1.04, 1.51)* | 1.25<br>(1.04, 1.51)* |

\* $P < 0.01$

Model 2: Age, sex, race/ethnicity (M1) + myocardial infarction, chronic obstructive pulmonary disease, atrial fibrillation, stroke, baseline diabetes, systolic blood pressure, body mass index, current smoking, eGFR, 24 hour urinary protein, ACEi/ARBs, diuretics, and beta blocker use.

Model 3: M2 + other cardiac biomarkers.

Model 4: M2 + LV Mass Index and Ejection Fraction.

Model 5: M2 + Year 1 KCCQ score.

<sup>^</sup>Incident Decline in KCCQ defined as participants with KCCQ  $\geq 75$  developing a KCCQ < 75 and having an average decline in KCCQ score of >3 points/year.

N = 2873 for year 1 KCCQ analysis.

N = 2132 for analysis of incident decline in KCCQ scores at year 5.

LV – left ventricular; KCCQ – Kansas City Cardiomyopathy Questionnaire; HF – heart failure; OR – odds ratio; CI – confidence interval; LLD - Lower Limit of Detection

**Table S7. Association of cardiac biomarkers with incident decline in KCCQ scores<sup>†</sup>, among participants with year 1 KCCQ  $\geq$  60 (N = 2461).**

|                                                                                      | <b>Incident Decline in KCCQ<sup>†</sup> Model 0<br/>HR (99% CI)</b> | <b>Incident Decline in KCCQ Model 1<br/>aHR (99% CI)</b> | <b>Incident Decline in KCCQ Model 2<br/>aHR (99% CI)</b> |
|--------------------------------------------------------------------------------------|---------------------------------------------------------------------|----------------------------------------------------------|----------------------------------------------------------|
| <b>GDF-15 Continuous Model</b><br>Log(GDF-15) per 1 SD (0.58 pg/mL) increase         | 1.65 (1.39, 1.95)*                                                  | 1.58 (1.31, 1.89)*                                       | 1.41 (1.13, 1.76)*                                       |
| <b>GDF-15 Categorical Model</b>                                                      |                                                                     |                                                          |                                                          |
| <b>Quintile 1</b> ( $\leq$ 856 pg/mL)                                                | 1.0 (Ref.)                                                          | 1.0 (Ref.)                                               | 1.0 (Ref.)                                               |
| <b>Quintile 2</b> (857 – 1200 pg/mL)                                                 | 2.01 (1.05, 3.85)*                                                  | 1.88 (0.97, 3.65)                                        | 1.69 (0.84, 3.37)                                        |
| <b>Quintile 3</b> (1201 – 1570 pg/mL)                                                | 2.79 (1.49, 5.23)*                                                  | 2.65 (1.39, 5.05)*                                       | 2.11 (1.05, 4.24)*                                       |
| <b>Quintile 4</b> (1571 – 2220 pg/mL)                                                | 3.70 (1.99, 6.86)*                                                  | 3.39 (1.77, 6.50)*                                       | 2.32 (1.10, 4.89)*                                       |
| <b>Quintile 5</b> ( $>$ 2220 pg/mL)                                                  | 5.04 (2.72, 9.35)*                                                  | 4.59 (2.39, 8.81)*                                       | 3.37 (1.57, 7.23)*                                       |
| <b>Galectin-3 Continuous Model</b><br>Log(Galectin-3) per 1 SD (0.50 pg/mL) increase | 1.33 (1.11, 1.58)*                                                  | 1.17 (0.98, 1.40)                                        | 1.03 (0.86, 1.23)                                        |
| <b>Galectin-3 Categorical Model</b>                                                  |                                                                     |                                                          |                                                          |
| <b>Quintile 1</b> ( $\leq$ 9.11 pg/mL)                                               | 1.0 (Ref.)                                                          | 1.0 (Ref.)                                               | 1.0 (Ref.)                                               |
| <b>Quintile 2</b> (9.12 – 12.2 pg/mL)                                                | 1.58 (0.89, 2.78)                                                   | 1.42 (0.80, 2.51)                                        | 1.31 (0.74, 2.34)                                        |
| <b>Quintile 3</b> (12.3 – 15.4 pg/mL)                                                | 1.80 (1.03, 3.16)*                                                  | 1.53 (0.87, 2.69)                                        | 1.32 (0.75, 2.32)                                        |
| <b>Quintile 4</b> (15.5 – 20.1 pg/mL)                                                | 2.08 (1.20, 3.62)*                                                  | 1.61 (0.92, 2.82)                                        | 1.22 (0.69, 2.16)                                        |
| <b>Quintile 5</b> ( $>$ 20.1 pg/mL)                                                  | 2.57 (1.47, 4.49)*                                                  | 1.83 (1.03, 3.24)*                                       | 1.28 (0.71, 2.30)                                        |
| <b>sST-2 Continuous Model</b><br>Log(sST-2) per 1 SD (0.55 pg/mL) increase           | 1.16 (0.97, 1.38)                                                   | 1.24 (1.02, 1.49)*                                       | 1.14 (0.93, 1.38)                                        |
| <b>sST-2 Categorical Model</b>                                                       |                                                                     |                                                          |                                                          |
| <b>Quintile 1</b> ( $\leq$ 10.4 pg/mL)                                               | 1.0 (Ref.)                                                          | 1.0 (Ref.)                                               | 1.0 (Ref.)                                               |
| <b>Quintile 2</b> (10.5 – 13.4 pg/mL)                                                | 1.42 (0.84, 2.41)                                                   | 1.50 (0.88, 2.56)                                        | 1.25 (0.73, 2.14)                                        |
| <b>Quintile 3</b> (13.5 – 16.8 pg/mL)                                                | 1.41 (0.83, 2.42)                                                   | 1.53 (0.89, 2.63)                                        | 1.24 (0.72, 2.14)                                        |
| <b>Quintile 4</b> (16.9 – 22 pg/mL)                                                  | 1.39 (0.80, 2.40)                                                   | 1.58 (0.91, 2.77)                                        | 1.13 (0.64, 2.00)                                        |
| <b>Quintile 5</b> ( $>$ 22 pg/mL)                                                    | 1.59 (0.93, 2.72)                                                   | 2.01 (1.15, 3.50)*                                       | 1.58 (0.90, 2.79)                                        |
| <b>hsTnT Continuous Model</b><br>Log(hsTnT) per 1 SD (0.78 ng/L) increase            | 1.41 (1.19, 1.66)*                                                  | 1.48 (1.24, 1.77)*                                       | 1.25 (1.01, 1.56)*                                       |
| <b>hsTnT Categorical Model</b>                                                       |                                                                     |                                                          |                                                          |
| <b>&lt; LLD</b> ( $<$ 10 ng/L)                                                       | 1.0 (Ref.)                                                          | 1.0 (Ref.)                                               | 1.0 (Ref.)                                               |
| <b>Tertile 1</b> (10.1 – 14.7 ng/L)                                                  | 1.38 (0.87, 2.20)                                                   | 1.51 (0.93, 2.43)                                        | 1.25 (0.76, 2.04)                                        |
| <b>Tertile 2</b> (14.8 – 23.9 ng/L)                                                  | 1.47 (0.93, 2.33)                                                   | 1.66 (1.02, 2.71)*                                       | 1.17 (0.70, 1.97)                                        |
| <b>Tertile 3</b> ( $>$ 23.9 ng/L)                                                    | 2.50 (1.62, 3.84)*                                                  | 2.90 (1.79, 4.69)*                                       | 1.90 (1.10, 3.26)*                                       |
| <b>NT-proBNP Continuous Model</b><br>Log(NT-proBNP) per 1 SD (1.60 pg/mL) increase   | 1.46 (1.22, 1.75)*                                                  | 1.40 (1.16, 1.69)*                                       | 1.14 (0.91, 1.41)                                        |
| <b>NT-proBNP Categorical Model</b>                                                   |                                                                     |                                                          |                                                          |
| <b>Quintile 1</b> ( $\leq$ 31.9 pg/mL)                                               | 1.0 (Ref.)                                                          | 1.0 (Ref.)                                               | 1.0 (Ref.)                                               |
| <b>Quintile 2</b> (31 – 76 pg/mL)                                                    | 1.19 (0.67, 2.10)                                                   | 1.12 (0.63, 1.99)                                        | 0.99 (0.55, 1.79)                                        |
| <b>Quintile 3</b> (76.1 – 158 pg/mL)                                                 | 1.39 (0.79, 2.44)                                                   | 1.32 (0.74, 2.33)                                        | 0.98 (0.54, 1.77)                                        |
| <b>Quintile 4</b> (158.1 – 370 pg/mL)                                                | 1.92 (1.12, 3.29)*                                                  | 1.84 (1.05, 3.20)*                                       | 1.27 (0.71, 2.30)                                        |
| <b>Quintile 5</b> ( $>$ 370 pg/mL)                                                   | 2.78 (1.64, 4.69)*                                                  | 2.41 (1.39, 4.16)*                                       | 1.43 (0.77, 2.66)                                        |

\* $P < 0.01$

<sup>†</sup>Incident Decline in KCCQ defined as participants with KCCQ  $\geq$  60 developing a KCCQ  $<$  60 and having an average decline in KCCQ score of  $>$  5 points/year.



Model 0: Unadjusted.

Model 1: Age, sex, race/ethnicity.

Model 2: M1 + myocardial infarction, chronic obstructive pulmonary disease, atrial fibrillation, stroke, baseline diabetes, systolic blood pressure, body mass index, current smoking, eGFR, 24h urinary protein, ACEi/ARBs, diuretics, and beta blocker use.

HF – heart failure; KCCQ – Kansas City Cardiomyopathy Questionnaire; HR – hazard ratio; CI – confidence interval;

aHR – adjusted hazard ratio;LLD - Lower Limit of Detection
